# Supplementary material
Source: ML conference proceedings conference paper supplement (https://proceedings.neurips.cc/paper_files/paper/2016/hash/a3d68b461bd9d3533ee1dd3ce4628ed4-Abstract.html)
Supplement: Supplementary file [file a3d68b461bd9d3533ee1dd3ce4628ed4-Supplemental.zip]

# Supplementary Information for Scalable Adaptive Stochastic Optimization Using Random Projections

## A Computational Complexity

Table A.1: Comparison of computational complexity in big O notation between ADA-FULL, ADA-LR and RADA GRAD.

| Operation                                       | Line | ADA-FULL | ADA-LR          | RADA GRAD     |
|-------------------------------------------------|------|----------|-----------------|---------------|
| $\Pi \mathbf{g}_t$                              | 3    |          |                 | $p \log \tau$ |
| $\mathbf{G}_t = \mathbf{g}_t \mathbf{g}_t^\top$ |      | $p^2$    | $p^2$           | $p\tau$       |
| $\mathbf{G}_t \Pi$                              | 4    |          | $p^2 \log \tau$ |               |
| QR-decomp                                       | 5    |          | $\tau^2 p$      | $\tau^2 p$    |
| $\mathbf{Q}^\top \mathbf{G}_t$                  | 6    |          | $\tau p^2$      | $\tau^2 p$    |
| SVD                                             | 7    | $p^3$    | $\tau^2 p$      | $\tau^3$      |
| $\mathbf{QW}$                                   | 8    |          |                 | $\tau^2 p$    |
| $\beta_{t+1} =$                                 | 10   | $p^2$    | $\tau p$        | $\tau p$      |
| Total                                           |      | $p^3$    | $\tau p^2$      | $\tau^2 p$    |

## B RADA-VR: RADA GRAD with variance reduction.

---

### Algorithm 3 RADA-VR

---

**Input:**  $\eta > 0, \delta \geq 0, \tau, S$  number of epochs,  $m$  iterations per epoch, initial  $\beta_0^1$

```

1: for  $s = 1 \dots S$  do
2:    $\mu = \nabla \sum_{i=1}^n f_i(\beta_0^s)$ 
3:   for  $t = 1 \dots m - 1$  do
4:     Compute VR gradient:  $\mathbf{g}_t = \nabla f_t(\beta_t^s) - \nabla f_t(\beta_0^s) + \mu$ 
5:     Project:  $\tilde{\mathbf{g}}_t = \Pi \mathbf{g}_t$ 
6:      $\tilde{\mathbf{G}}_t = \tilde{\mathbf{G}}_{t-1} + \mathbf{g}_t \tilde{\mathbf{g}}_t^\top$ 
7:      $\mathbf{Q}_t, \mathbf{R}_t \leftarrow \text{qr\_update}(\mathbf{Q}_{t-1}, \mathbf{R}_{t-1}, \mathbf{g}_t, \tilde{\mathbf{g}}_t)$ 
8:      $\mathbf{B} = \tilde{\mathbf{G}}_t^\top \mathbf{Q}$ 
9:      $\mathbf{U}, \Sigma, \mathbf{W} = \mathbf{B}$  {SVD}
10:     $\mathbf{V} = \mathbf{W} \tilde{\mathbf{Q}}^\top$ 
11:     $\beta_{t+1}^s = \beta_t^s - \eta \mathbf{V}(\Sigma^{1/2} + \delta \mathbf{I})^{-1} \mathbf{V}^\top \mathbf{g}_t - \gamma_t$ 
12:  end for
13:   $\beta_0^{s+1} = \beta_{t+1}^s$ 
14: end for

```

**Output:**  $\beta_m^S$

---

## C Analysis

### C.1 Regret bound for ADA-LR

The following proof is based on the proof for Theorem 7 in [9]. The key difference is that instead of having the square root and (pseudo)-inverse of the full matrix  $\mathbf{G}_t : \mathbf{G}_t^{1/2}$  and  $\mathbf{S}_t^\dagger$  we have the approximate square root and inverse based on the randomized SVD [15]:  $\tilde{\mathbf{S}}_t = (\mathbf{Q} \mathbf{Q}^\top \mathbf{G}_t)^{1/2}$  and  $\tilde{\mathbf{S}}_t^\dagger = (\mathbf{Q} \mathbf{Q}^\top \mathbf{G}_t)^{-1/2}$ . Essentially we use the proximal function  $\psi_t = \langle \mathbf{x}, \tilde{\mathbf{S}}_t \mathbf{x} \rangle$  or  $\psi_t = \langle \mathbf{x}, \tilde{\mathbf{H}}_t \mathbf{x} \rangle$  where we set  $\tilde{\mathbf{H}}_t = \delta \mathbf{I} + \tilde{\mathbf{S}}_t$ . Here  $\mathbf{Q}$  is the approximate basis for the range of the matrix  $\mathbf{G}_t$  [15].

We first state the following facts about the relationship between  $\mathbf{G}$  and  $\tilde{\mathbf{G}}^{-1/2}$ .

**Lemma 3.** Defining  $\tilde{\mathbf{G}}^{-1/2} = (\mathbf{Q}\mathbf{Q}^\top \mathbf{G})^{-1/2}$  we have

$$(I) \quad \tilde{\mathbf{G}}^{-1/2} \mathbf{G} = (\mathbf{G}^{-1}(\mathbf{Q}\mathbf{Q}^\top) \mathbf{G}^2)^{1/2},$$

$$(II) \quad \text{tr}((\mathbf{G}^{-1}(\mathbf{Q}\mathbf{Q}^\top) \mathbf{G}^2)^{1/2}) = \text{tr}(\tilde{\mathbf{G}}^{1/2}).$$

We also require the following Lemma which bounds the sequence of proximal terms by the trace of the final  $\tilde{\mathbf{G}}^{-1/2}$ .

**Lemma 4** (Based on Lemma 10 in [9]).

$$\sum_{t=1}^T \langle \mathbf{g}_t, \tilde{\mathbf{G}}_t^{-1/2} \mathbf{g}_t \rangle \leq 2 \sum_{t=1}^T \langle \mathbf{g}_t, \tilde{\mathbf{G}}_T^{-1/2} \mathbf{g}_t \rangle = 2\text{tr}(\tilde{\mathbf{G}}_T^{1/2}). \quad (3)$$

We are now ready to prove Proposition 2.

*Proof of Proposition 2.* Inspecting Lemma 6:

$$R(T) \leq \frac{1}{\eta} \psi_T(\beta^{\text{opt}}) + \frac{\eta}{2} \sum_{t=1}^T \|f'_t(\beta_t)\|_{\psi_{T-1}^*}^2,$$

we first bound the term  $\sum_{t=1}^T \|f'_t(\beta_t)\|_{\psi_{T-1}^*}^2$ .

From [9, Proof of Theorem 7] we have that the squared dual norm associated with  $\psi_t$  is

$$\|\mathbf{x}\|_{\psi_t^*}^2 = \langle \mathbf{x}, (\delta \mathbf{I} + (\mathbf{Q}\mathbf{Q}^\top \mathbf{G}_t)^{1/2})^{-1} \mathbf{x} \rangle$$

and thus it is clear that  $\|\mathbf{g}_t\|_{\psi_t^*}^2 \leq \langle \mathbf{g}_t, (\mathbf{Q}\mathbf{Q}^\top \mathbf{G}_t)^{-1/2} \mathbf{g}_t \rangle$ . Lemma 8 shows that  $\|\mathbf{g}_t\|_{\psi_{t-1}^*}^2 \leq \langle \mathbf{g}_t, \tilde{\mathbf{S}}_t \mathbf{g}_t \rangle$  as long as  $\delta \geq \|\mathbf{g}_t\|_2$ . Lemma 4 then implies that

$$\sum_{t=1}^T \|f'_t(\beta_t)\|_{\psi_{T-1}^*}^2 \leq 2\text{tr}(\tilde{\mathbf{G}}_T^{1/2}).$$

We now bound  $2\text{tr}(\tilde{\mathbf{G}}_T^{1/2})$  by  $2(\text{tr}(\mathbf{G}_T^{1/2}) + \tau\sqrt{\epsilon})$ :

$$\text{tr}(\tilde{\mathbf{G}}_T^{1/2}) - \text{tr}(\mathbf{G}_T^{1/2}) = \text{tr}(\tilde{\mathbf{G}}_T^{1/2} - \mathbf{G}_T^{1/2}) \quad (4)$$

$$= \sum_{j=1}^{\tau} \left( \lambda_j(\tilde{\mathbf{G}}_T^{1/2}) - \lambda_j(\mathbf{G}_T^{1/2}) \right) - \sum_{j=\tau+1}^p \lambda_j(\mathbf{G}_T^{1/2}) \quad (5)$$

$$\leq \sum_{j=1}^{\tau} \left( \lambda_j(\tilde{\mathbf{G}}_T^{1/2}) - \lambda_1(\mathbf{G}_T^{1/2}) \right) \quad (6)$$

since  $\lambda_j(\tilde{\mathbf{G}}_T) = 0, \forall j > \tau$ .

Now, using the reverse triangle inequality and Theorem 5 we obtain

$$\sum_{j=1}^{\tau} \left( \lambda_1(\tilde{\mathbf{G}}_T^{1/2}) - \lambda_1(\mathbf{G}_T^{1/2}) \right) \leq \sum_{j=1}^{\tau} \|\tilde{\mathbf{G}}_T^{1/2} - \mathbf{G}_T^{1/2}\|_2 \quad (7)$$

$$\leq \sum_{j=1}^{\tau} \sqrt{\epsilon} \quad (8)$$

$$\leq \tau\sqrt{\epsilon}. \quad (9)$$

It remains to show that  $\psi_T(\beta^{\text{opt}})$  in Lemma 6 is bounded by  $(\delta + \sqrt{\epsilon} + \text{tr}(\mathbf{G}_T^{1/2})) \|\beta^{\text{opt}}\|^2$  to get the statement of Theorem 2:

$$\begin{aligned}\psi_T(\beta^{\text{opt}}) &= \langle \beta^{\text{opt}}, \delta \mathbf{I} + (\mathbf{Q}\mathbf{Q}^\top \mathbf{G}_T)^{1/2} \beta^{\text{opt}} \rangle \\ &\leq \|\beta^{\text{opt}}\|^2 \|(\mathbf{Q}\mathbf{Q}^\top \mathbf{G}_T)^{1/2}\|_2 + \delta \|\beta^{\text{opt}}\|^2 \\ &\leq \|\beta^{\text{opt}}\|^2 (\sqrt{\epsilon} + \|\mathbf{G}_T^{1/2}\|) + \delta \|\beta^{\text{opt}}\|^2 \\ &\leq \|\beta^{\text{opt}}\|^2 (\sqrt{\epsilon} + \text{tr}(\mathbf{G}_T^{1/2})) + \delta \|\beta^{\text{opt}}\|^2\end{aligned}$$

where we again use the reverse triangle inequality and Theorem 5 as above.

Finally, plugging this into the statement of Lemma 6 and setting  $\eta = \|\beta^{\text{opt}}\|_2$  (as in Corollary 11 in [9]) we get the expression for the regret of ADA-LR as stated in Theorem 2.  $\square$

## C.2 Proofs of supporting results

*Proof of Lemma 3.* By direct computation we have for (I)

$$\begin{aligned}\tilde{\mathbf{G}}^{-1/2} \mathbf{G} &= (\mathbf{Q}\mathbf{Q}^\top \mathbf{G})^{-1/2} \mathbf{G} \\ &= ((\mathbf{Q}\mathbf{Q}^\top \mathbf{G})^{-1} \mathbf{G}^2)^{1/2} \\ &= (\mathbf{G}^{-1} (\mathbf{Q}\mathbf{Q}^\top)^{-1} \mathbf{G}^2)^{1/2} \\ &= (\mathbf{G}^{-1} (\mathbf{Q}\mathbf{Q}^\top) \mathbf{G}^2)^{1/2}.\end{aligned}$$

and for (II)

$$\begin{aligned}\text{tr}((\mathbf{G}^{-1} (\mathbf{Q}\mathbf{Q}^\top) \mathbf{G}^2)^{1/2}) &= \text{tr}((\mathbf{Q}^\top \mathbf{G} \mathbf{Q})^{1/2}) \\ &= \text{tr}((\mathbf{Q}\mathbf{Q}^\top \mathbf{G})^{1/2}) \\ &= \text{tr}(\tilde{\mathbf{G}}^{1/2}).\end{aligned}$$

$\square$

*Proof of Lemma 4.* We set up the following proof by induction. In the base case:

$$\langle \mathbf{g}_1, \tilde{\mathbf{G}}_1^{-1/2}, \mathbf{g}_1 \rangle = \text{tr}(\tilde{\mathbf{G}}_1^{-1/2} \mathbf{g}_1 \mathbf{g}_1^\top) = \text{tr}(\tilde{\mathbf{G}}_1^{1/2}) \leq 2\text{tr}(\tilde{\mathbf{G}}_1^{1/2}),$$

where we have used (II).

Now, assuming that the lemma is true for  $T-1$ , we get:

$$\sum_{t=1}^T \langle g_t, \tilde{\mathbf{G}}_t^{-1/2}, g_t \rangle \leq 2 \sum_{t=1}^T \langle \mathbf{g}_t, \tilde{\mathbf{G}}_{T-1}^{-1/2} \mathbf{g}_t \rangle + \langle \mathbf{g}_T, \tilde{\mathbf{G}}_T^{-1/2} \mathbf{g}_T \rangle.$$

Now using that  $\tilde{\mathbf{G}}_{T-1}^{-1/2}$  does not depend on  $t$  and (II):

$$\sum_{t=1}^{T-1} \langle g_t, \tilde{\mathbf{G}}_{T-1}^{-1/2} g_t \rangle = \text{tr}(\tilde{\mathbf{G}}_{T-1}^{-1/2} \mathbf{G}_{T-1}) = \text{tr}(\tilde{\mathbf{G}}_{T-1}^{1/2}).$$

Therefore we get

$$\sum_{t=1}^T \langle g_t, \tilde{\mathbf{G}}_t^{-1/2} g_t \rangle \leq 2\text{tr}(\tilde{\mathbf{G}}_{T-1}^{1/2}) + \langle \mathbf{g}_T, \tilde{\mathbf{G}}_T^{-1/2} \mathbf{g}_T \rangle. \quad (10)$$

We can rewrite

$$\text{tr}(\tilde{\mathbf{G}}_{T-1}^{1/2}) = \text{tr}((\mathbf{Q}_{T-1} \mathbf{Q}_{T-1}^\top \mathbf{G}_T - \mathbf{Q}_{T-1} \mathbf{Q}_{T-1}^\top \mathbf{g}_T \mathbf{g}_T^\top)^{1/2}) \quad (11)$$

Now since  $\text{range}(\mathbf{Q}_{T-1}) \subset \text{range}(\mathbf{Q}_T)$  and Proposition 8.5 in [15] we can use Lemma 7 with  $\nu = 1$  and  $\mathbf{g} = \mathbf{g}_T$  to obtain:

$$2\text{tr}(\tilde{\mathbf{G}}_{T-1}^{1/2}) + \langle \mathbf{g}_T, \tilde{\mathbf{G}}_T^{-1/2}, \mathbf{g}_T \rangle \leq 2\text{tr}(\tilde{\mathbf{G}}_T^{1/2}) \quad (12)$$

$\square$

## D Supporting Results

**Theorem 5** (SRFT approximation error (Theorem 11.2 in [15])). *Defining  $\epsilon = \sqrt{1 + 7p/\tau} \cdot \sigma_{k+1}$  the following holds with failure probability at most  $O(k^{-1})$*

$$\|\mathbf{G}_t - \mathbf{Q}\mathbf{Q}^\top \mathbf{G}_t\|_2 \leq \epsilon, \quad (13)$$

where  $\sigma_{k+1}$  is the  $k$ th largest singular value of  $\mathbf{G}_t$ , and  $4 \left[ \sqrt{k} + \sqrt{8 \log(kn)} \right]^2 \leq \tau \leq p$ .

**Lemma 6** (Proposition 2 from [9]).

$$R(T) := \sum_{t=1}^T f_t(\beta_t) + \varphi(\beta_t) - f_t(\beta^{opt}) - \varphi(\beta^{opt}) \leq \frac{1}{\eta} \psi_T(\beta^{opt}) + \frac{\eta}{2} \sum_{t=1}^T \|f'_t(\beta_t)\|_{\psi_{T-1}^*}^2$$

**Lemma 7** (Lemma 8 from [9]). *Let  $\mathbf{B} \succeq 0$ . For any  $\nu$  such that  $\mathbf{B} - \nu \mathbf{g}\mathbf{g}^\top \succeq 0$  the following holds*

$$2\text{tr}((\mathbf{B} - \nu \mathbf{g}\mathbf{g}^\top)^{1/2}) \leq 2\text{tr}(\mathbf{B}^{1/2}) - \nu \text{tr}(\mathbf{B}^{1/2} \mathbf{g}\mathbf{g}^\top)$$

**Lemma 8** (Lemma 9 from [9]). *Let  $\delta \geq \|\mathbf{g}\|_2$  and  $\mathbf{A} \succeq 0$ , then*

$$\langle \mathbf{g}, (\delta \mathbf{I} + \mathbf{A}^{1/2})^{-1} \mathbf{g} \rangle \leq \langle \mathbf{g}, ((\mathbf{A} + \mathbf{g}\mathbf{g}^\top)^\dagger)^{1/2} \mathbf{g} \rangle$$

## References

- [1] Z. Allen-Zhu and E. Hazan. Variance reduction for faster non-convex optimization. In *Proceedings of the 33rd International Conference on Machine Learning*, 2016.
- [2] S.-I. Amari. Natural gradient works efficiently in learning. *Neural computation*, 10(2):251–276, 1998.
- [3] D. Balduzzi. Deep online convex optimization with gated games. *arXiv preprint arXiv:1604.01952*, 2016.
- [4] D. Balduzzi and M. Ghifary. Strongly-typed recurrent neural networks. In *Proceedings of the 33rd International Conference on Machine Learning*, 2016.
- [5] R. H. Byrd, S. Hansen, J. Nocedal, and Y. Singer. A stochastic quasi-newton method for large-scale optimization. *arXiv preprint arXiv:1401.7020*, 2014.
- [6] Y. N. Dauphin, H. de Vries, J. Chung, and Y. Bengio. Rmsprop and equilibrated adaptive learning rates for non-convex optimization. *arXiv preprint arXiv:1502.04390*, 2015.
- [7] A. Defazio, F. Bach, and S. Lacoste-Julien. Saga: A fast incremental gradient method with support for non-strongly convex composite objectives. In *Advances in Neural Information Processing Systems*, 2014.
- [8] G. Desjardins, K. Simonyan, R. Pascanu, et al. Natural neural networks. In *Advances in Neural Information Processing Systems*, pages 2062–2070, 2015.
- [9] J. Duchi, E. Hazan, and Y. Singer. Adaptive subgradient methods for online learning and stochastic optimization. *The Journal of Machine Learning Research*, 12:2121–2159, 2011.
- [10] J. C. Duchi, M. I. Jordan, and H. B. McMahan. Estimation, optimization, and parallelism when data is sparse. In *Advances in Neural Information Processing Systems*, 2013.
- [11] G. H. Golub and C. F. Van Loan. *Matrix computations*, volume 3. JHU Press, 2012.
- [12] A. Gonen and S. Shalev-Shwartz. Faster sgd using sketched conditioning. *arXiv preprint arXiv:1506.02649*, 2015.
- [13] Y. Gong, S. Kumar, H. Rowley, and S. Lazebnik. Learning binary codes for high-dimensional data using bilinear projections. In *Proceedings of CVPR*, pages 484–491, 2013.
- [14] R. Grosse and R. Salakhudinov. Scaling up natural gradient by sparsely factorizing the inverse fisher matrix. In *Proceedings of the 32nd International Conference on Machine Learning*, pages 2304–2313, 2015.
- [15] N. Halko, P. G. Martinsson, and J. A. Tropp. Finding structure with randomness: Probabilistic algorithms for constructing approximate matrix decompositions. *SIAM Review*, 53(2):217–288, 2011.
- [16] C. Heinze, B. McWilliams, and N. Meinshausen. Dual-loco: Distributing statistical estimation using random projections. In *Proceedings of AISTATS*, 2016.
- [17] C. Heinze, B. McWilliams, N. Meinshausen, and G. Krummenacher. Loco: Distributing ridge regression with random projections. *arXiv preprint arXiv:1406.3469*, 2014.
- [18] T. Hofmann, A. Lucchi, S. Lacoste-Julien, and B. McWilliams. Variance reduced stochastic gradient descent with neighbors. In *Advances in Neural Information Processing Systems*, 2015.
- [19] R. Johnson and T. Zhang. Accelerating stochastic gradient descent using predictive variance reduction. In *Advances in Neural Information Processing Systems*, pages 315–323, 2013.

- [20] N. S. Keskar and A. S. Berahas. adaQN: An Adaptive Quasi-Newton Algorithm for Training RNNs. Nov. 2015.
- [21] D. Kingma and J. Ba. Adam: A method for stochastic optimization. *arXiv preprint arXiv:1412.6980*, 2014.
- [22] A. Lucchi, B. McWilliams, and T. Hofmann. A variance reduced stochastic newton method. *arXiv preprint arXiv:1503.08316*, 2015.
- [23] H. Luo, A. Agarwal, N. Cesa-Bianchi, and J. Langford. Efficient second order online learning via sketching. *arXiv preprint arXiv:1602.02202*, 2016.
- [24] M. W. Mahoney. Randomized algorithms for matrices and data. Apr. 2011. arXiv:1104.5557v3 [cs.DS].
- [25] M. P. Marcus, M. A. Marcinkiewicz, and B. Santorini. Building a large annotated corpus of english: The penn treebank. *Computational linguistics*, 19(2):313–330, 1993.
- [26] J. Martens and R. Grosse. Optimizing neural networks with kronecker-factored approximate curvature. In *Proceedings of the 32nd International Conference on Machine Learning*, 2015.
- [27] B. McWilliams, G. Krummenacher, M. Lucic, and J. M. Buhmann. Fast and robust least squares estimation in corrupted linear models. In *Advances in Neural Information Processing Systems*, volume 27, 2014.
- [28] B. Neyshabur, R. R. Salakhutdinov, and N. Srebro. Path-sgd: Path-normalized optimization in deep neural networks. In *Advances in Neural Information Processing Systems*, pages 2413–2421, 2015.
- [29] J. Pennington, R. Socher, and C. D. Manning. Glove: Global vectors for word representation. In *EMNLP*, volume 14, pages 1532–1543, 2014.
- [30] L. Zhang, M. Mahdavi, R. Jin, T. Yang, and S. Zhu. Recovering optimal solution by dual random projection. *arXiv preprint arXiv:1211.3046*, 2012.
